# Supplementary material for: Exploring Autonomic Alterations during Seizures in Temporal Lobe Epilepsy: Insights from a Heart-Rate Variability Analysis
Source: MDPI journal article supplement (doi:10.3390/jcm12134284), 2023-06-26
Supplement: s1 [file s1]

**Supplementary Table S1.** Repeated measures ANOVA for the HRV parameters along with language dominance and interval.

| HRV index         | Source                      | $\eta_p^2$    | F            | <i>p</i>      |
|-------------------|-----------------------------|---------------|--------------|---------------|
| Mean RRI [ms]     | Dominance                   | 0.0010        | 0.17         | 0.6844        |
|                   | <b>Interval</b>             | <b>0.3003</b> | <b>36.04</b> | <b>0.0000</b> |
|                   | Dominance x interval        | 0.0156        | 1.33         | 0.2675        |
| SDNN [ms]         | Dominance                   | 0.0001        | 0.01         | 0.9251        |
|                   | Interval                    | 0.0165        | 1.41         | 0.2467        |
|                   | Dominance x interval        | 0.2528        | 2.18         | 0.1164        |
| RMSSD [ms]        | Dominance                   | 0.0215        | 3.69         | 0.0564        |
|                   | <b>Interval</b>             | <b>0.1008</b> | <b>9.41</b>  | <b>0.0001</b> |
|                   | <b>Dominance x interval</b> | <b>0.0439</b> | <b>3.85</b>  | <b>0.0231</b> |
| pNN 50 [%]        | Dominance                   | 0.0266        | 4.59         | 0.0335        |
|                   | <b>Interval</b>             | <b>0.2057</b> | <b>21.76</b> | <b>0.0000</b> |
|                   | <b>Dominance x interval</b> | <b>0.1072</b> | <b>10.09</b> | <b>0.0001</b> |
| Normalized LF [%] | Dominance                   | 0.0015        | 0.26         | 0.6138        |
|                   | <b>Interval</b>             | <b>0.0879</b> | <b>8.09</b>  | <b>0.0004</b> |
|                   | Dominance x interval        | 0.0285        | 2.46         | 0.0884        |
| Normalized HF [%] | <b>Dominance</b>            | <b>0.0400</b> | <b>7.00</b>  | <b>0.0089</b> |
|                   | Interval                    | 0.0122        | 1.04         | 0.3568        |
|                   | <b>Dominance x interval</b> | <b>0.1156</b> | <b>10.98</b> | <b>0.0000</b> |
| LF/HF ratio       | <b>Dominance</b>            | <b>0.0433</b> | <b>7.60</b>  | <b>0.0065</b> |
|                   | <b>Interval</b>             | <b>0.0580</b> | <b>5.17</b>  | <b>0.0066</b> |
|                   | <b>Dominance x Interval</b> | <b>0.0782</b> | <b>7.12</b>  | <b>0.0011</b> |
| CVI               | Dominance                   | 0.0002        | 0.03         | 0.8601        |
|                   | Interval                    | 0.0458        | 4.03         | 0.0194        |
|                   | Dominance x interval        | 0.0273        | 2.36         | 0.0974        |
| CSI               | Dominance                   | 0.0121        | 2.06         | 0.1530        |
|                   | Interval                    | 0.0013        | 0.11         | 0.8970        |
|                   | Dominance x interval        | 0.0136        | 1.16         | 0.3160        |

**Supplementary Table S2.** Independent t-test results for HRV parameters with hippocampal atrophy in each interval.

| HRV INDEX  | PRE-ICTAL            |                      |               | ICTAL                |                      |          | POST-ICTAL           |                      |               |
|------------|----------------------|----------------------|---------------|----------------------|----------------------|----------|----------------------|----------------------|---------------|
|            | Positive<br>(n = 32) | Negative<br>(n = 41) | <i>p</i>      | Positive<br>(n = 32) | Negative<br>(n = 41) | <i>p</i> | Positive<br>(n = 32) | Negative<br>(n = 41) | <i>p</i>      |
| RRI [ms]   | 791.1 ± 204.6        | 793.9 ± 149.7        | 0.9480        | 558.8 ± 93.9         | 606.6 ± 108.6        | 0.0516   | 661.6 ± 127.0        | 713.6 ± 134.7        | 0.0973        |
| SDNN [ms]  | 105.4 ± 69.9         | 98.8 ± 47.3          | 0.6352        | 117.2 ± 75.5         | 112.9 ± 50.9         | 0.7685   | 84.1 ± 46.1          | 100.5 ± 66.6         | 0.2397        |
| RMSSD [ms] | 34.2 ± 9.3           | 33.4 ± 6.0           | 0.6519        | 39.1 ± 17.3          | 41.3 ± 8.2           | 0.4696   | <b>29.5 ± 5.6</b>    | <b>32.9 ± 8.1</b>    | <b>0.0454</b> |
| pNN50      | 5.7 ± 4.2            | 5.6 ± 3.3            | 0.8903        | 9.2 ± 6.0            | 10.8 ± 7.2           | 0.3083   | 4.7 ± 3.0            | 5.3 ± 4.0            | 0.5136        |
| nLF [%]    | 42.1 ± 15.4          | 41.9 ± 17.1          | 0.9735        | 51.8 ± 17.4          | 50.8 ± 15.7          | 0.8011   | 44.6 ± 18.8          | 43.2 ± 17.9          | 0.7540        |
| nHF [%]    | <b>18.0 ± 13.3</b>   | <b>25.7 ± 16.0</b>   | <b>0.0309</b> | 22.5 ± 21.6          | 25.5 ± 21.7          | 0.5622   | 17.9 ± 15.7          | 17.9 ± 13.7          | 0.4160        |
| LF/HF      | 4.3 ± 4.1            | 3.1 ± 4.5            | 0.2543        | 7.2 ± 9.5            | 6.6 ± 9.7            | 0.7726   | 3.6 ± 3.0            | 4.4 ± 5.4            | 0.4241        |
| CSI        | 3.4 ± 0.4            | 3.4 ± 0.3            | 0.9691        | 3.5 ± 0.4            | 3.6 ± 0.3            | 0.4423   | 3.3 ± 0.3            | 3.4 ± 0.4            | 0.1451        |
| CVI        | 5.3 ± 2.9            | 5.7 ± 4.3            | 0.7128        | 5.8 ± 3.6            | 5.2 ± 2.9            | 0.4074   | 5.1 ± 2.8            | 5.3 ± 2.7            | 0.7233        |

**Supplementary Table S3.** Independent t-test results for HRV parameters with amygdala enlargement in each interval.

| HRV INDEX  | PRE-ICTAL            |                      |          | ICTAL                |                      |               | POST-ICTAL           |                      |          |
|------------|----------------------|----------------------|----------|----------------------|----------------------|---------------|----------------------|----------------------|----------|
|            | Positive<br>(n = 14) | Negative<br>(n = 61) | <i>p</i> | Positive<br>(n = 14) | Negative<br>(n = 61) | <i>p</i>      | Positive<br>(n = 14) | Negative<br>(n = 61) | <i>p</i> |
| RRI [ms]   | 725.0 ± 150.1        | 810.6 ± 177.4        | 0.0990   | 605.2 ± 120.1        | 583.5 ± 100.3        | 0.4834        | 680.5 ± 124.3        | 696.4 ± 139.7        | 0.6971   |
| SDNN [ms]  | 103.8 ± 62.8         | 102.6 ± 57.5         | 0.9428   | 131.1 ± 94.7         | 111.94 ± 52.7        | 0.3024        | 98.3 ± 55.1          | 92.7 ± 59.2          | 0.7457   |
| RMSSD [ms] | 32.7 ± 7.9           | 34.3 ± 7.7           | 0.4837   | <b>47.1 ± 21.6</b>   | <b>38.6 ± 9.4</b>    | <b>0.0238</b> | 32.1 ± 6.8           | 31.3 ± 7.3           | 0.7021   |
| pNN50      | 5.4 ± 3.9            | 6.0 ± 4.1            | 0.6476   | 12.6 ± 10.2          | 9.5 ± 5.5            | 0.1172        | 5.0 ± 2.2            | 5.1 ± 3.8            | 0.9218   |
| nLF [%]    | 40.5 ± 22.6          | 42.5 ± 14.4          | 0.6718   | <b>42.1 ± 16.2</b>   | <b>53.5 ± 15.7</b>   | <b>0.0175</b> | 41.8 ± 17.6          | 43.8 ± 18.6          | 0.7214   |
| nHF [%]    | 27.1 ± 20.6          | 21.0 ± 13.5          | 0.1810   | 29.0 ± 30.3          | 22.5 ± 19.1          | 0.3073        | 15.7 ± 12.9          | 20.0 ± 14.7          | 0.3205   |
| LF/HF      | 4.4 ± 8.0            | 3.4 ± 3.3            | 0.4584   | 6.3 ± 7.8            | 7.2 ± 9.9            | 0.7708        | 4.2 ± 2.9            | 3.9 ± 4.8            | 0.8049   |
| CSI        | 3.4 ± 0.3            | 3.4 ± 0.3            | 0.6598   | 3.6 ± 0.4            | 3.5 ± 0.3            | 0.2479        | 3.4 ± 0.4            | 3.3 ± 0.3            | 0.6962   |
| CVI        | 6.5 ± 6.5            | 5.3 ± 2.7            | 0.2620   | 5.2 ± 3.5            | 5.6 ± 3.3            | 0.6663        | 5.6 ± 3.4            | 5.2 ± 2.5            | 0.5838   |

**Supplementary Table S4.** Independent t-test for HRV parameters with sustained theta activity in each interval.

| HRV INDEX  | PRE-ICTAL            |                      |          | ICTAL                |                      |          | POST-ICTAL           |                      |               |
|------------|----------------------|----------------------|----------|----------------------|----------------------|----------|----------------------|----------------------|---------------|
|            | Positive<br>(n = 24) | Negative<br>(n = 48) | <i>p</i> | Positive<br>(n = 24) | Negative<br>(n = 48) | <i>p</i> | Positive<br>(n = 24) | Negative<br>(n = 48) | <i>p</i>      |
| RRI [ms]   | 791.2 ± 186.2        | 798.4 ± 175.6        | 0.8722   | 587.3 ± 100.2        | 587.8 ± 109.6        | 0.9837   | 672.0 ± 130.5        | 711.2 ± 138.8        | 0.2533        |
| SDNN [ms]  | 112.4 ± 74.0         | 97.1 ± 50.3          | 0.3061   | 135.8 ± 75.2         | 108.2 ± 54.0         | 0.0784   | 92.0 ± 70.8          | 95.5 ± 52.7          | 0.8147        |
| RMSSD [ms] | 35.2 ± 10.0          | 33.3 ± 6.5           | 0.3249   | 41.1 ± 18.9          | 40.3 ± 8.8           | 0.8154   | 31.2 ± 9.5           | 32.0 ± 6.1           | 0.7197        |
| pNN50      | 5.7 ± 3.2            | 5.7 ± 4.3            | 0.9623   | 11.9 ± 8.3           | 9.4 ± 5.7            | 0.1346   | 5.1 ± 4.6            | 5.2 ± 3.0            | 0.9620        |
| nLF [%]    | 42.4 ± 15.2          | 41.0 ± 16.5          | 0.7365   | 51.1 ± 17.9          | 51.9 ± 15.5          | 0.8547   | 44.9 ± 14.8          | 43.9 ± 19.7          | 0.8335        |
| nHF [%]    | 25.3 ± 13.9          | 20.5 ± 16.0          | 0.2135   | 30.0 ± 23.8          | 21.3 ± 20.3          | 0.1113   | <b>26.9 ± 14.2</b>   | <b>16.3 ± 13.2</b>   | <b>0.0026</b> |
| LF/HF      | 2.3 ± 1.8            | 4.3 ± 5.3            | 0.0750   | 4.3 ± 2.7            | 8.5 ± 11.1           | 0.0850   | 2.7 ± 3.0            | 4.5 ± 5.0            | 0.1136        |
| CSI        | 3.5 ± 0.4            | 3.4 ± 0.3            | 0.3318   | 2.6 ± 0.3            | 3.5 ± 0.3            | 0.1581   | 3.3 ± 0.4            | 3.4 ± 0.3            | 0.5482        |
| CVI        | 5.8 ± 3.3            | 5.4 ± 4.0            | 0.7081   | 6.5 ± 3.0            | 5.2 ± 3.5            | 0.1295   | 5.1 ± 2.6            | 5.3 ± 2.7            | 0.6920        |
